# Supplementary material
Source: PubMed Central journal article supplement (PMC3210928)
Supplement: NIHMS311152-supplement-1.pdf [file NIHMS311152-supplement-1.pdf]

## Supplementary Information Titles

**Journal:** Nature Medicine

**Article Title:** Epigenetic suppression of GAD65 expression mediates persistent pain

**Corresponding Author:** Zhizhong Z. Pan

### Supplementary Item & Number:

**1. Supplementary figure 1** Persistent pain does not alter acetylated H3 levels in selected promoter regions of *gad67* gene.

**2. Supplementary figure 2** Histone deacetylase inhibitor increases GAD67 protein expression.

**3. Supplementary figure 3** Persistent pain increases excitability of MOR-expressing NRM cells.

**4. Supplementary figure 4** An antidepressant drug does not alter neuropathic pain-induced reduction in GAD65 protein expression.

**5. Supplementary methods.**
